# Supplementary material for: Selective removal of IgG from the urine of patients with proteinuria using a polymer coated core–shell magnetic nanoparticle
Source: Royal Society of Chemistry journal article supplement (doi:10.1039/c6ra24560a), 2016-01-01
Supplement: c6ra24560a1.pdf [file c6ra24560a1.pdf]

## Supplementary information

### Selective removal of IgG from proteinuria using a polymer coated core-shell magnetic nanoparticle

Zhifen Deng<sup>a</sup>, Kai Hu<sup>b</sup>, Liangliang Bi<sup>b</sup>, Hang Yuan<sup>c</sup>, Yanlong Chen<sup>a</sup>, Shengnan Zhao<sup>a</sup>,  
Huifang Du<sup>a</sup>, Xuesheng Yuan<sup>a</sup>, Yanjie Huang<sup>\*b</sup>, Shusheng Zhang<sup>\*ac</sup>

<sup>a</sup> College of Chemistry and Molecular Engineering, Zhengzhou University,  
Zhengzhou, 450001, P. R. China

<sup>b</sup> Henan University of Chinese Medicine, Zhengzhou University, Zhengzhou, 450008,  
P. R. China

<sup>c</sup> Center for Advanced Analysis and Computational Science, Zhengzhou University,  
Zhengzhou, 450001, P. R. China

**Corresponding authors: Dr. Shusheng Zhang, zsszz@126.com**

**Dr. Yanjie Huang, huangyanjie69@hotmail.com**



ultrasonication, and subsequently NaAc (7.2 g), PEG (1 g) were added to the solution. After vigorous stirring for 0.5 h, the solution was transferred to a teflon-lined stainless steel autoclave (100 mL capacity), push N<sub>2</sub> for 15 min to remove oxygen, then heated at 200 °C for 12 h, and then cooled to room temperature. The nanoparticles were collected with a magnet, washed with ethanol and H<sub>2</sub>O. For characterization, dry it under vacuum at 30 °C, about 0.7 g Fe<sub>3</sub>O<sub>4</sub> nanoparticles can be obtained.

The obtained Fe<sub>3</sub>O<sub>4</sub> from the first step was put into use for preparation of Fe<sub>3</sub>O<sub>4</sub>@SiO<sub>2</sub> directly without drying. They were dispersed evenly in 700 mL mixture of ethanol-H<sub>2</sub>O (4:1) and 5.25 mL NH<sub>3</sub>·H<sub>2</sub>O with ultrasonication for 30 min, then the mixture was stirred for 30 min at room temperature. 2.8 mL TEOS was added into it and stirred for another 10 h under N<sub>2</sub> protection. The product was washed with ethanol and water successively.

Redisperse the obtained wet Fe<sub>3</sub>O<sub>4</sub>@SiO<sub>2</sub> in 200 mL solvent of ethanol-H<sub>2</sub>O (4:1) and 6 mL NH<sub>3</sub>·H<sub>2</sub>O, then 1.6 mL KH-570 was added and stirred under 40 °C for 24 h. The product Fe<sub>3</sub>O<sub>4</sub>@SiO<sub>2</sub>@KH-570 was collect with a magnet and washed with ethanol, dry under vacuum at 30 °C.

### ***Preparation of Fe<sub>3</sub>O<sub>4</sub>@SiO<sub>2</sub>@MAsp-HEMA***

Mini-emulsion polymerization method was adopted to prepare Fe<sub>3</sub>O<sub>4</sub>@SiO<sub>2</sub>@MAsp-HEMA. HEMA was monomer, EGDMA was cross-linker, SDS and PVA consist of complex emusifier.

The first aqueous phase was prepared by dissolving PVA (0.2 g), SDS (0.030 g),

and  $\text{NaHCO}_3$  (0.025 g) in 10 mL water, ultrasonic degassing. The second aqueous phase was prepared by dissolving PVA (0.1 g), SDS (0.1 g) in 200 mL water, ultrasonic degassing. The oil phase was prepared by mixing HEMA (0.7 mL), EGDMA (1.4 mL) and MAsp (0.25 mmol). Then  $\text{Fe}_3\text{O}_4@\text{SiO}_2@\text{KH-570}$  (0.70 g, 0.1 mmol) was added into the first aqueous phase under ultrasonic and mechanical stirring, after 30 min, drop the oil phase into the magnetic fluid. The second aqueous phase was lastly added under mechanical stirring. Flow  $\text{N}_2$  for 30 min, then added  $(\text{NH}_4)_2\text{S}_2\text{O}_8$  (0.125 g) and  $\text{NaHSO}_3$  (0.125 g) into the system and heated to 40 °C, to initiate the reaction. Kept stirring for 24h. The final product of  $\text{Fe}_3\text{O}_4@\text{SiO}_2@\text{MAsp-HEMA}$  was washed by ethanol/water (v/v, 1:1), then dried it under vacuum at 40 °C for 24 h.

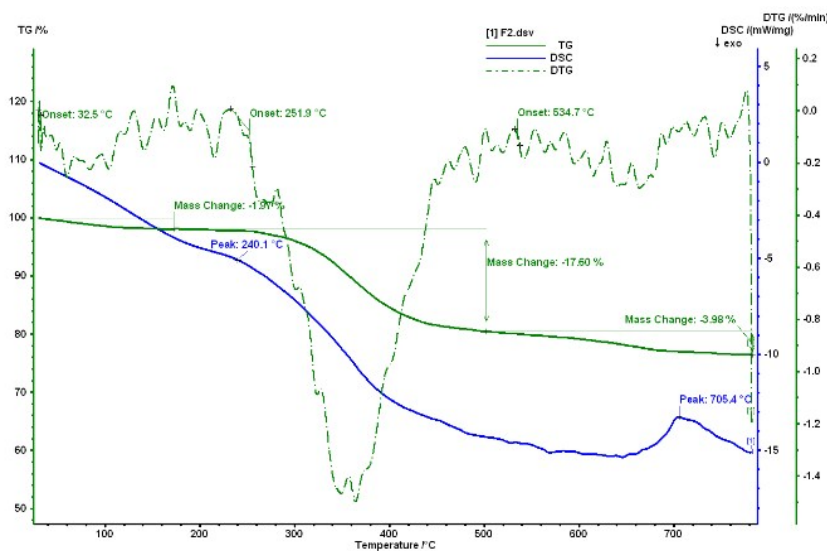

**Fig. S3 Thermo gravimetric curve of  $\text{Fe}_3\text{O}_4@\text{SiO}_2@\text{MAsp-HEMA}$**

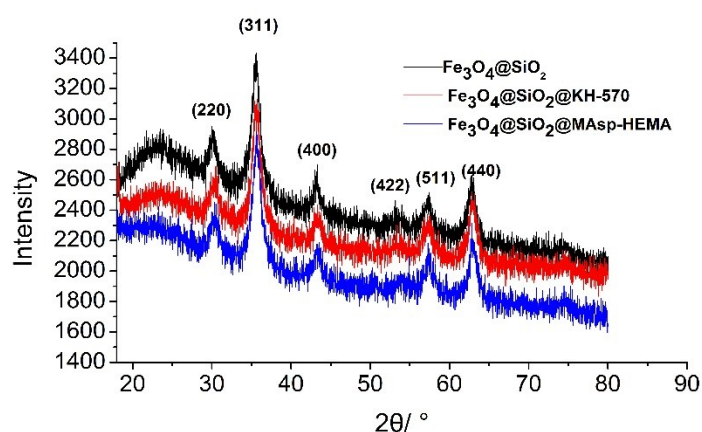

**Fig. S4 XRD pattern of  $\text{Fe}_3\text{O}_4@SiO_2$ ,  $\text{Fe}_3\text{O}_4@SiO_2@KH-570$ , and  $\text{Fe}_3\text{O}_4@SiO_2@MAsp-HEMA$**

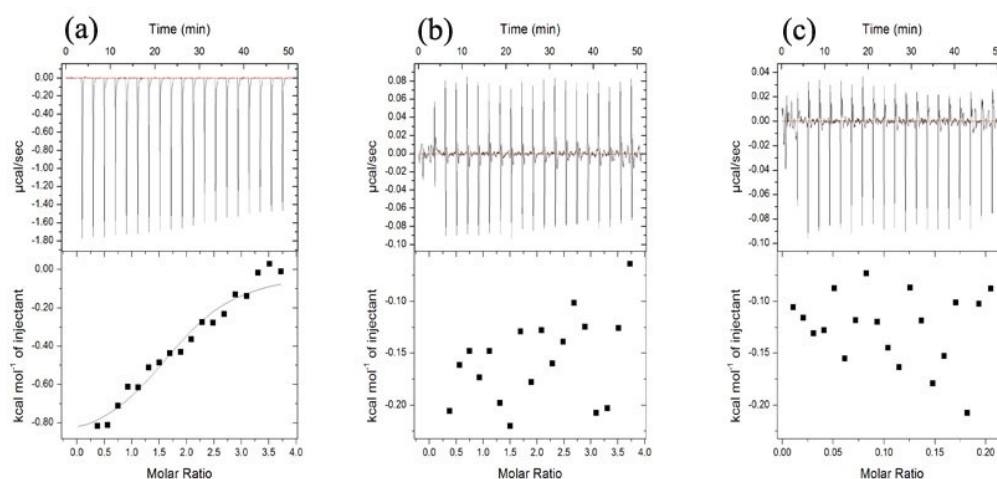

**Fig. S5 ITC graphs of the MAsp titration with (a) IgG, (b) BSA and (c) no protein in PBS (0.01M, pH 7.2). Solid squares: titration data; line: fitted titration curve**

### *Optimization of FASS-CE*

Four background electrolyte solutions include 2.3M acetic acid+0.05% Tween20 (pH=2.1), 2.3M acetic acid+0.1% Tween20 (pH=2.1), 1.7M acetic acid+0.1% Tween20 (pH=2.2), and 40 mM chloroacetic acid+0.1% Tween20 (pH=2.2) were evaluated; four separation voltage levels at 10 kV, 15 kV, 20 kV and 25 kV were explored, respectively; the different sample injection pressures (+13 kV; +15 kV; +20 kV; +25 kV), time (10 s, 20 s, 25 s, 30 s, 40 s), and water-plug time (30 mbar $\times$ 10 s, 30 mbar $\times$ 20 s, 30 mbar $\times$ 30 s) were studied. Taken the migration time,  $R_s$  and column efficiency into consideration, the optimized conditions were 2.3M acetic acid+0.1% Tween20 (pH=2.1) of background electrolyte, 10 kV separation voltage, electrokinetic injection: 25 kV $\times$ 30 s, water-plug: 30 mbar $\times$ 10 s.
